# Supplementary material for: Self-sufficient, low-cost microfluidic pumps utilising reinforced balloons
Source: Royal Society of Chemistry journal article supplement (doi:10.1039/c9lc00618d), 2019-01-01
Supplement: c9lc00618d1.pdf [file c9lc00618d1.pdf]

## Supplementary Information

### Self-sufficient, low-cost microfluidic pumps utilising reinforced balloons

Peter Thurgood <sup>1,†</sup>, Sergio Aguilera Suarez <sup>1</sup>, Sheng Chen <sup>1</sup>, Christopher Gilliam <sup>1</sup>,  
Elena Pirogova <sup>1</sup>, Aaron R. Jex <sup>2,3</sup>, Sara Baratchi <sup>4,\*</sup>, Khashayar Khoshmanesh <sup>1,\*,†</sup>

<sup>1</sup> School of Engineering, RMIT University, Melbourne, Australia

<sup>2</sup> Population Health and Immunity Division, The Walter and Eliza Hall Institute of Medical  
Research, Parkville, Australia

<sup>3</sup> Faculty of Veterinary and Agricultural Sciences, The University of Melbourne, Parkville,  
Australia

<sup>4</sup> School of Health & Biomedical Sciences, RMIT University, Bundoora, Australia

\* These authors contributed equally.

† **Corresponding authors:**

Peter Thurgood: [peter.thurgood@rmit.edu.au](mailto:peter.thurgood@rmit.edu.au)

Khashayar Khoshmanesh: [Khashayar.khoshmanesh@rmit.edu.au](mailto:Khashayar.khoshmanesh@rmit.edu.au)

## Supplementary Information 1: Assembly process of the reinforced balloon pumps

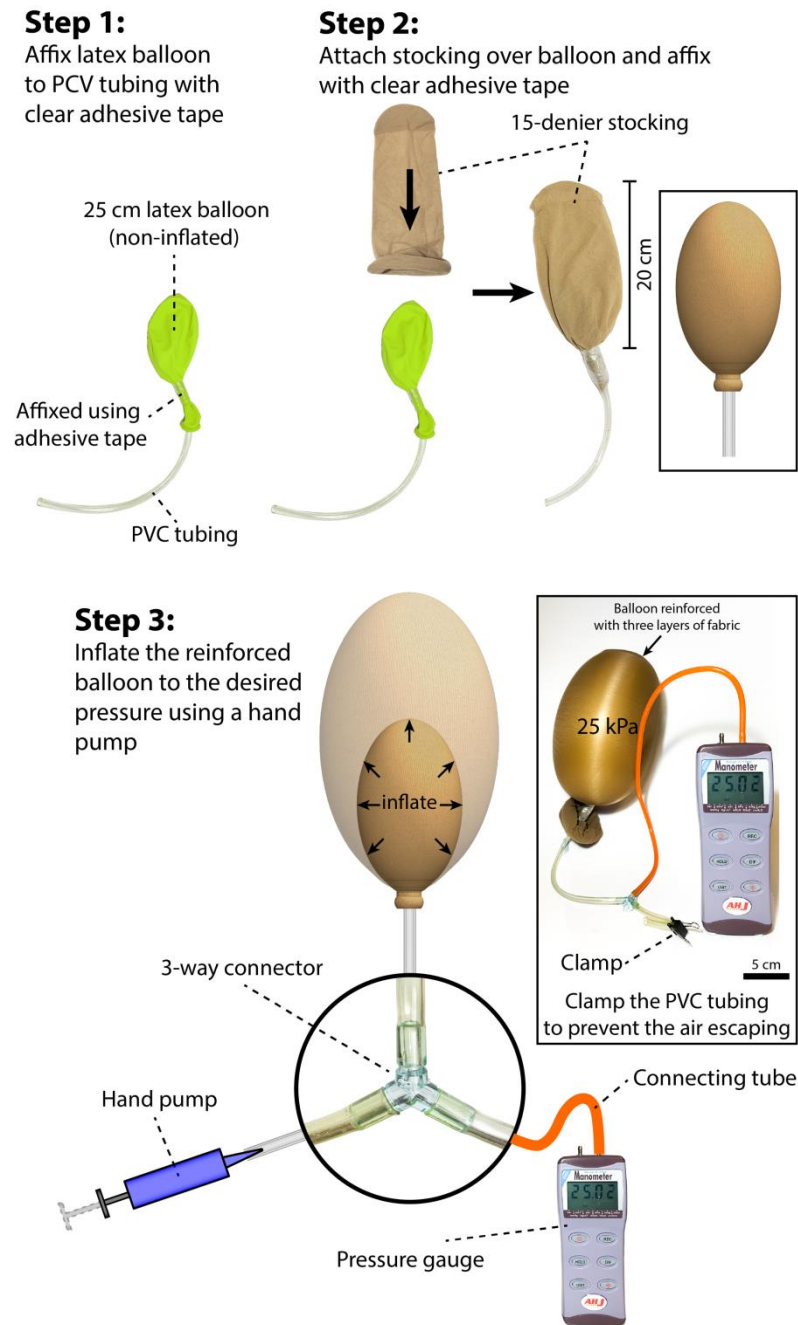

**Figure S1.** The process of assembling of the reinforced balloon, consisting of three major steps: Step 1: A latex balloon is affixed to a section of PVC tubing with removable adhesive tape. Step 2: A stocking is then placed over the balloon and affixed to the PVC tubing. Step 3: The assembled reinforced latex balloon is coupled with a digital pressure gauge and a manual hand pump via PVC tubing and a 3-way hose connector for inflation.

## Supplementary Information 2: Experimental setup

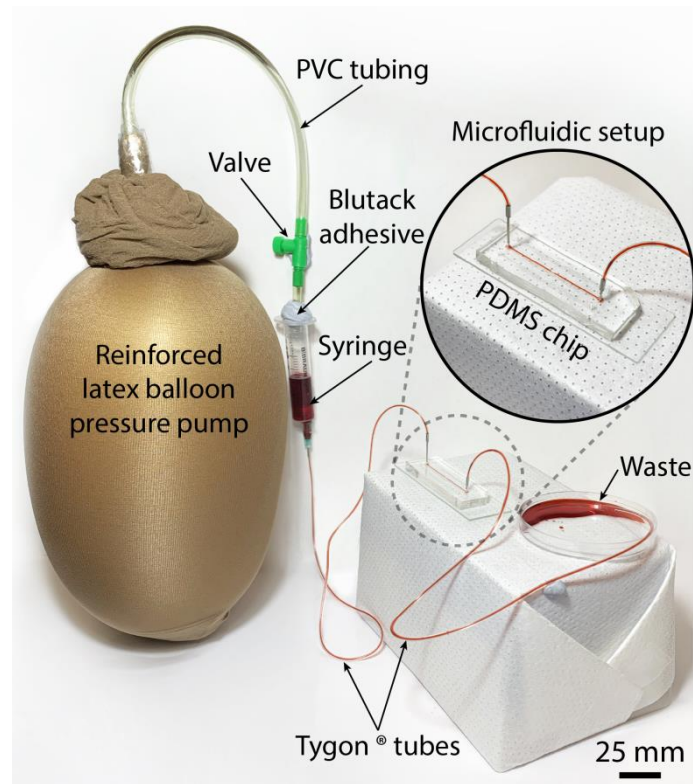

**Figure S2.** Experimental setup of the reinforced balloon pump consisting of (i) a reinforced latex balloon, (ii) connected to a liquid filled syringe, (iii) using PVC tubing, (iv) with an optional 2-way valve, (v) interfaced with a PDMS based microfluidic structure, (vi) using Tygon® tubing.

**Supplementary Information 3:** Detailed geometry of microfluidic structures used in the manuscript

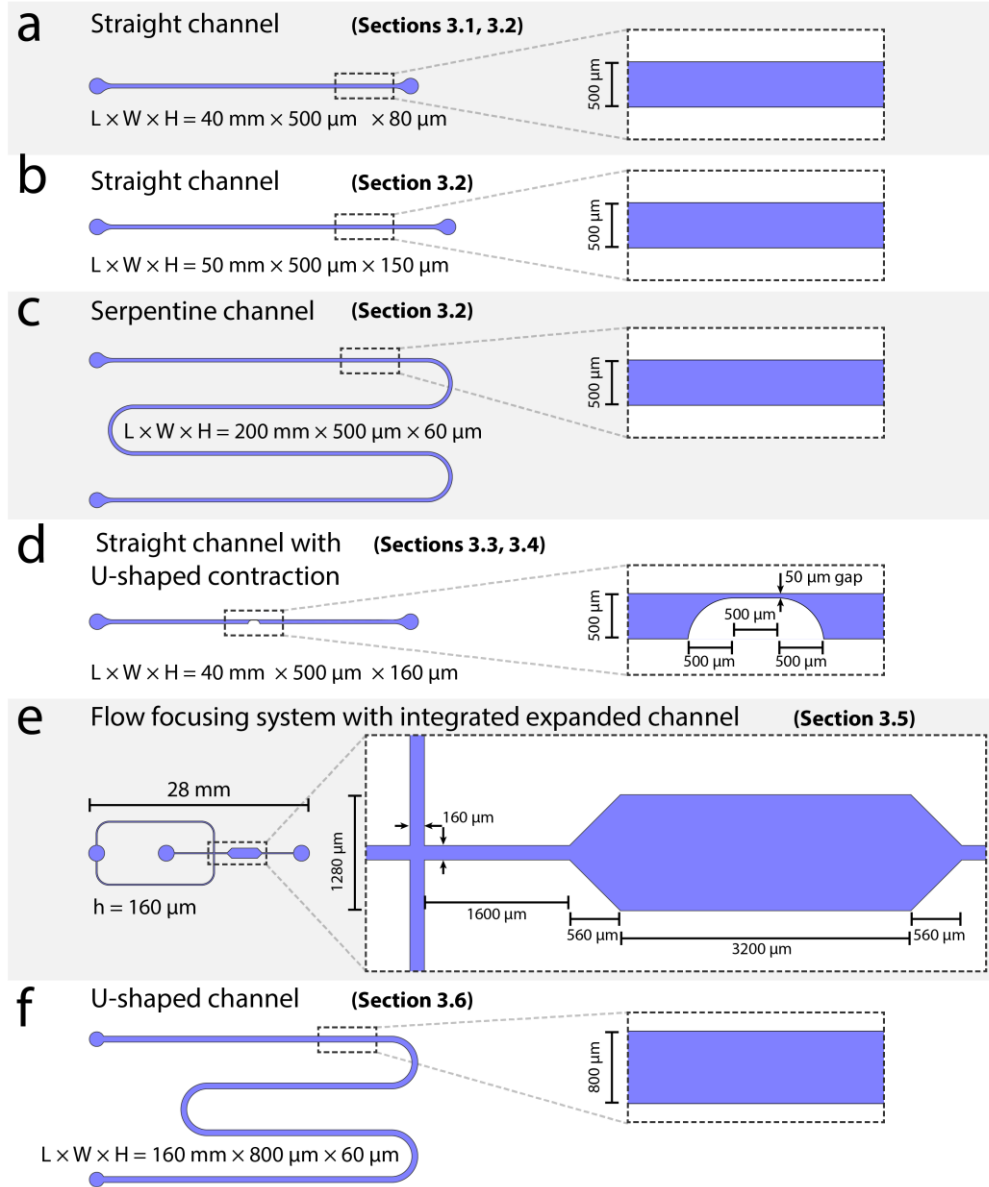

**Figure S3.** Detailed geometry of the microfluidic structures used in our work, including (a-b) straight channels, (c) serpentine channel used for long-term experiments, (d) straight channel with U-shaped contraction used for hydrodynamic orbiting of cells, (e) Flow-focusing system with an integrated expanded channel used for dynamic exchange of solutions, and (f) U-shaped channel used for mechanobiology experiment.

**Supplementary Information 4:** Pressure-volume curve for various balloon configurations

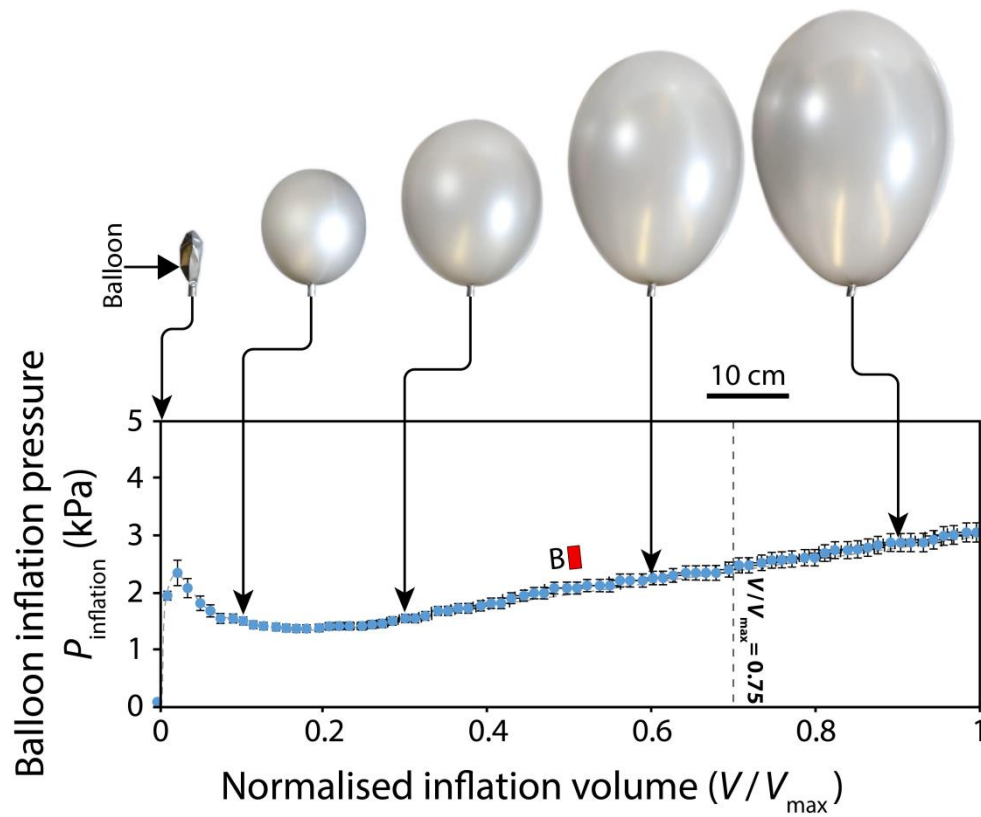

**Figure S4a.** Inflation pressure-normalised volume curve ( $P_{\text{inflation}}$  vs.  $V/V_{\text{max}}$ ) obtained for the **reference balloon**. Images show the expansion of the reference balloon at various pressures. Error bars represent average  $\pm$  standard deviation obtained in three sets of independent experiments.

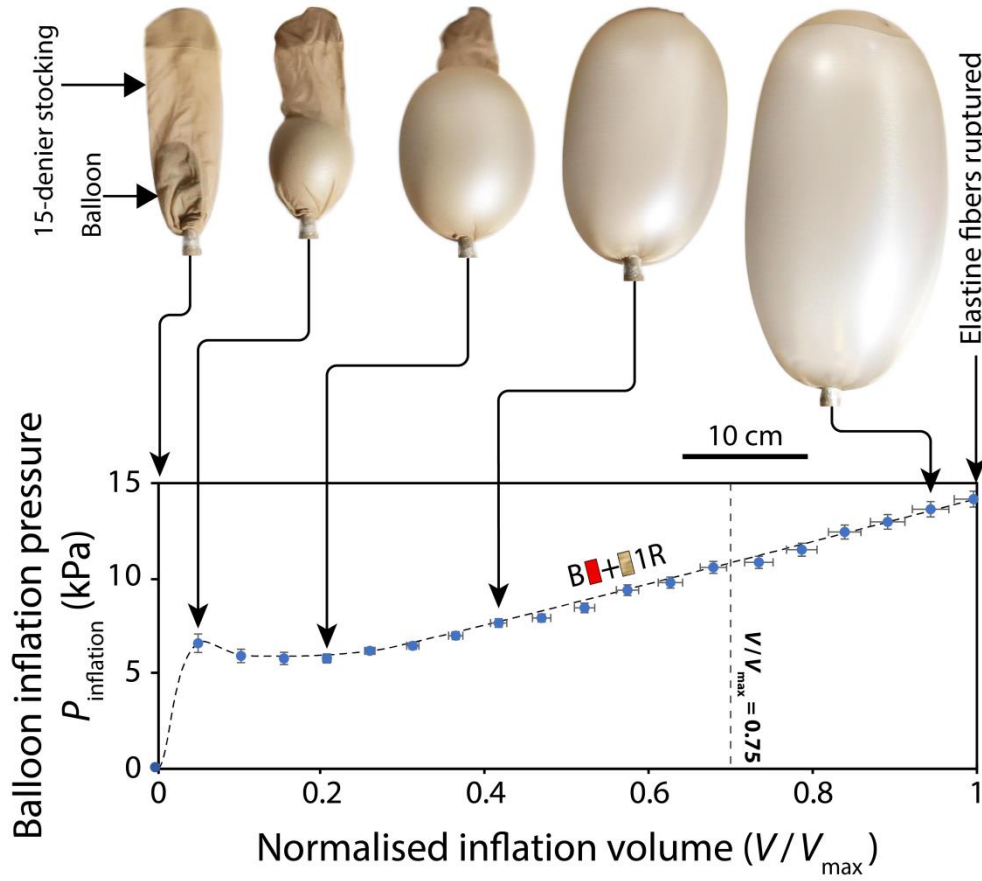

**Figure S4b.** Inflation pressure-normalised volume curve ( $P_{\text{inflation}}$  vs.  $V/V_{\text{max}}$ ) obtained for the **latex balloon reinforced with one layer of elastane fibres (B + 1R)** using a 15-denier stocking. Images show the expansion of the reinforced balloon at various pressures. Error bars represent average  $\pm$  standard deviation obtained in three sets of independent experiments.

## Appendix 1: Radius-inflation pressure curve of a latex balloon

The radius-inflation pressure curve of latex balloons is described using the spherical thin shell model <sup>1-4</sup>, as given below:

$$P_{inflation} = P_{balloon} - P_{\infty} = \frac{2 \gamma t_o}{r_o} k(\lambda) (\lambda^{-1} - \lambda^{-7}) \quad (1)$$

where,  $P_{balloon}$  and  $P_{\infty}$  are the internal balloon and ambient pressure,  $\gamma$  is the shear modulus of the latex,  $t_o$  and  $r_o$  are thickness and non-deformed radius of the balloon,  $\lambda = r/r_o$  is the stretch ratio of the balloon, and  $k(\lambda)$  is a dimensionless parameter, which according to the Mooney-Rivlin model <sup>5</sup> can be calculated as  $k(\lambda) = 1 + \alpha \lambda^2$ . The radius-inflation pressure curve of latex balloons has been investigated in detail in our previous work <sup>6</sup>.

**Supplementary Information 5:** Comparing the volume of the reference and reinforced balloons

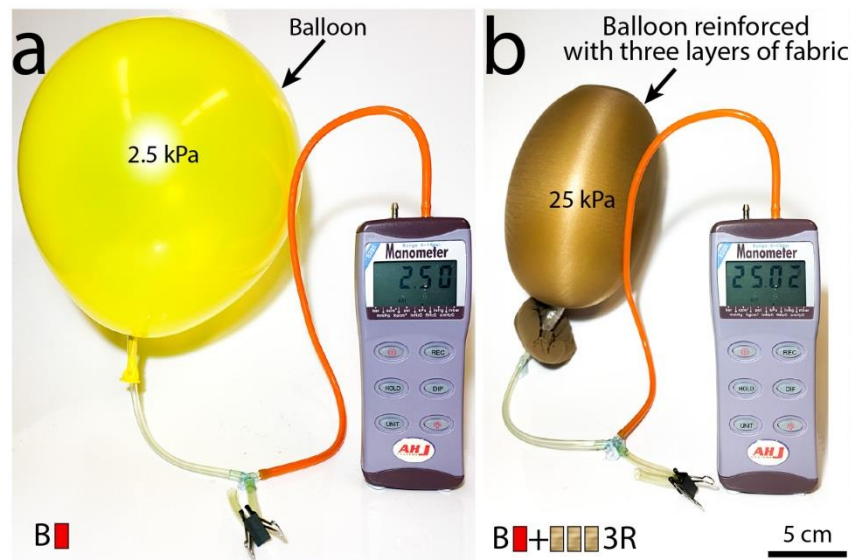

**Figure S5.** Comparing the volume of the reference and reinforced latex balloons. **(a)** The reference (non-reinforced) latex balloon inflated to  $P_{\text{inflation}} = 2.5$  kPa. **(b)**. The latex balloon reinforced with three layers of elastane fibres (B + 3R) inflated to  $P_{\text{inflation}} = 25$  kPa.



**Supplementary Information 6:** Variations of balloon inflation pressure and reinforcing coefficient versus the number of reinforcing layers

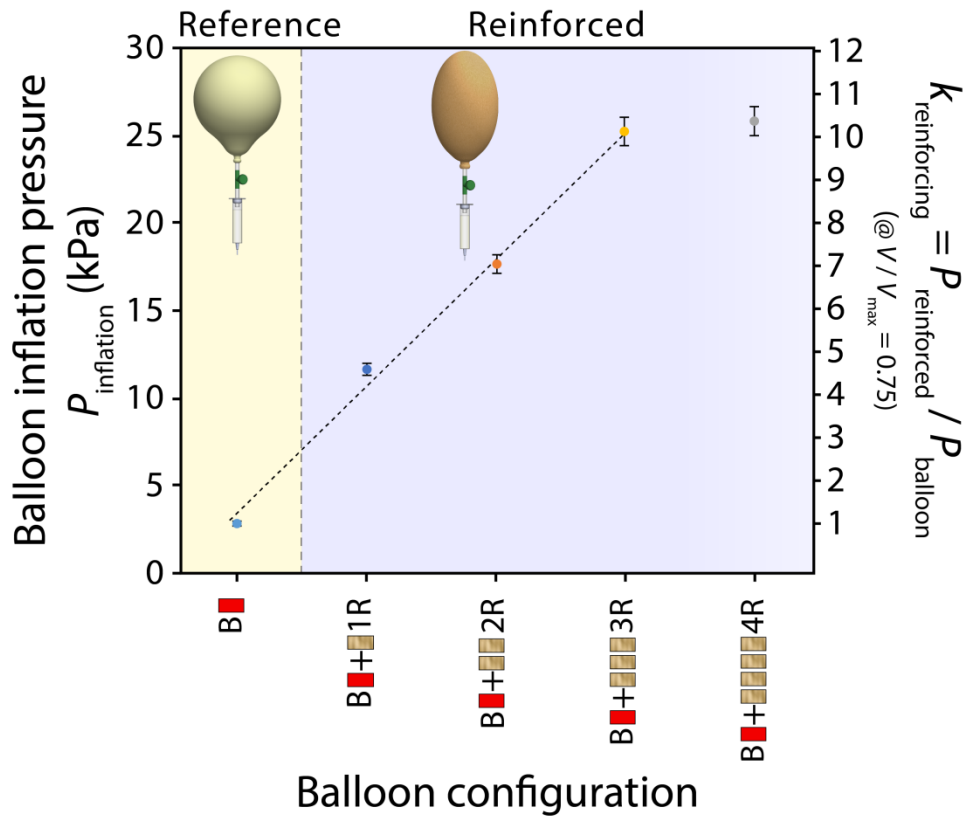

**Figure S6.** Variations of balloon inflation pressure and ‘reinforcing coefficient’ versus the number of reinforcing layers, obtained at  $V/V_{\text{max}} = 0.75$ . Error bars represent average  $\pm$  standard deviation obtained in three sets of independent experiments.

**Supplementary Information 7:** Pressure-volume curves of reinforced balloons obtained with various stocking brands

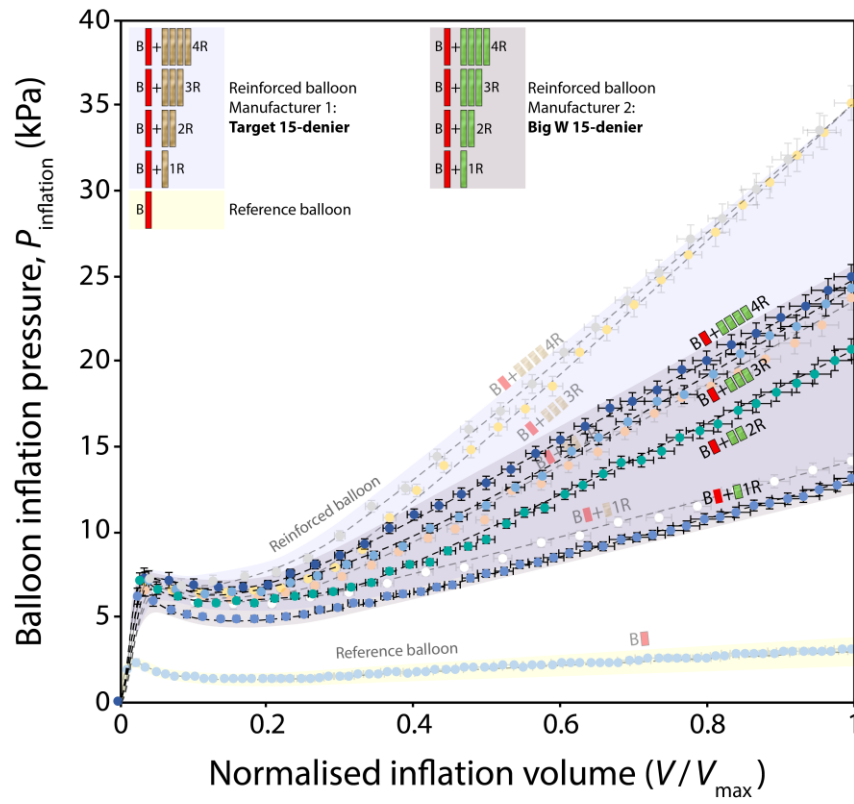

**Figure S7.** Pressure-normalised volume ( $P_{\text{inflation}}$  vs.  $V/V_{\text{max}}$ ) curves of reinforced balloons obtained with Big W 15-denier and Target 15-denier. Figure legend notation: B represents the latex balloon while R represents the reinforcing elastane layer. Error bars represent average  $\pm$  standard deviation obtained in three sets of independent experiments.

**Supplementary Information 8:** Fatigue analysis of reinforced balloons over repeated inflations

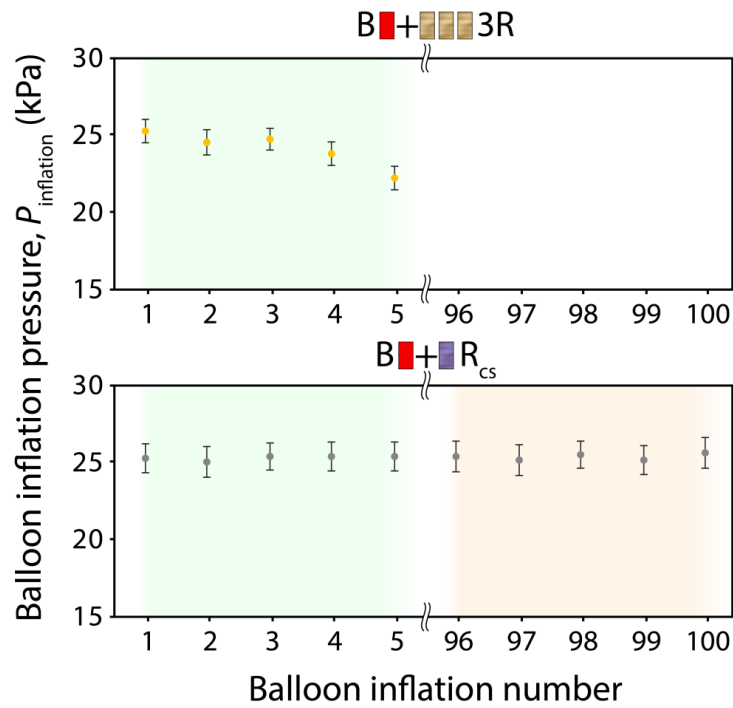

**Figure S8a.** Variations of balloon inflation pressure versus the number of inflations ( $P_{\text{inflation}}$  vs.  $N_{\text{inflation}}$ ), obtained for the reinforced balloons using three layers of elastane fibres (B + 3R) and compression socks (B + R<sub>cs</sub>). Error bars represent average  $\pm$  standard deviation obtained in five sets of independent experiments.

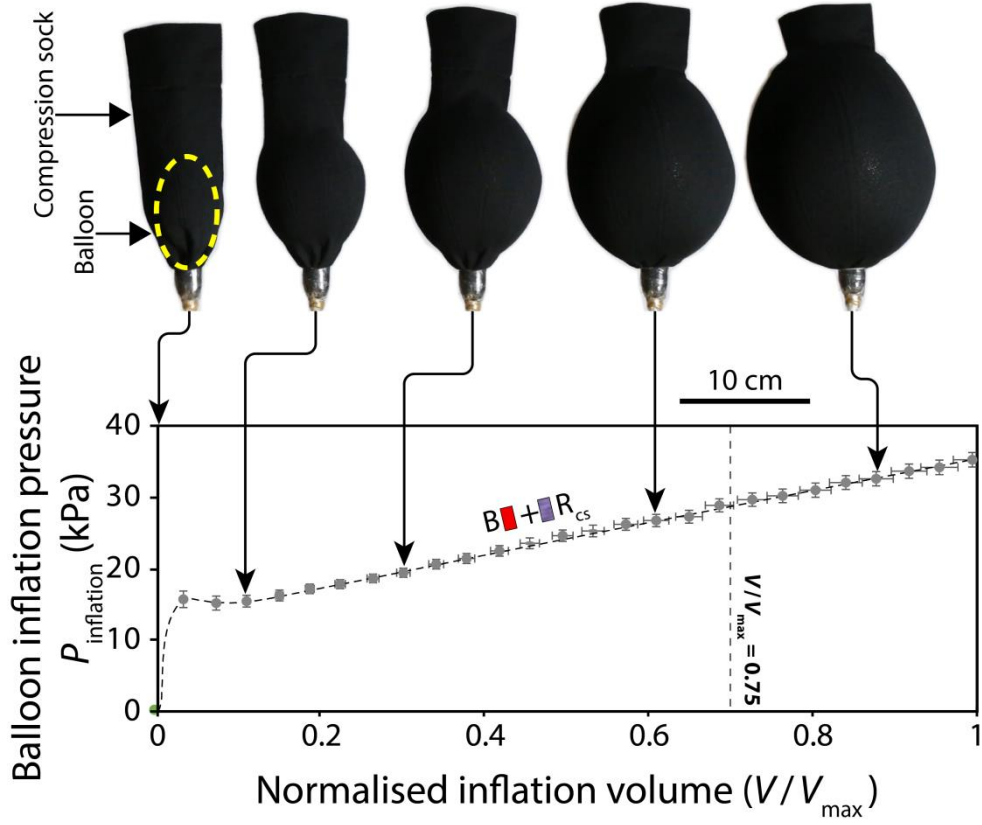

**Figure S8b.** Inflation pressure-normalised volume curve ( $P_{\text{inflation}}$  vs.  $V/V_{\text{max}}$ ) obtained for the **latex balloon reinforced with one layer of compression socks (B + 1R<sub>cs</sub>)**. Images show the expansion of the reinforced balloon at various pressures. Error bars represent average  $\pm$  standard deviation obtained in three sets of independent experiments.

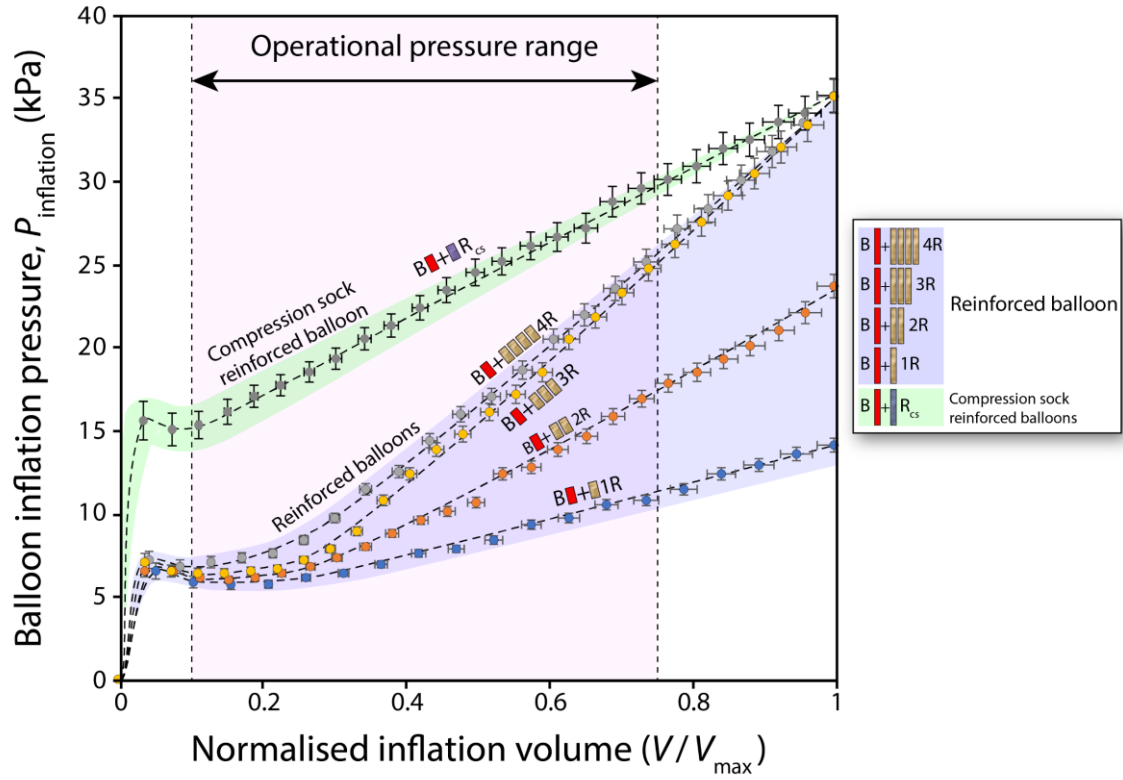

**Figure S8c.** Pressure-normalised volume ( $P_{\text{inflation}}$  vs.  $V/V_{\text{max}}$ ) curves of reinforced balloons obtained with stockings and compression socks. Figure legend notation: B represents the latex balloon while R represents the reinforcing elastane layer. Error bars represent average  $\pm$  standard deviation obtained in three sets of independent experiments.

# Supporting information 9: Pumping viscous liquids with the reinforced balloon pump

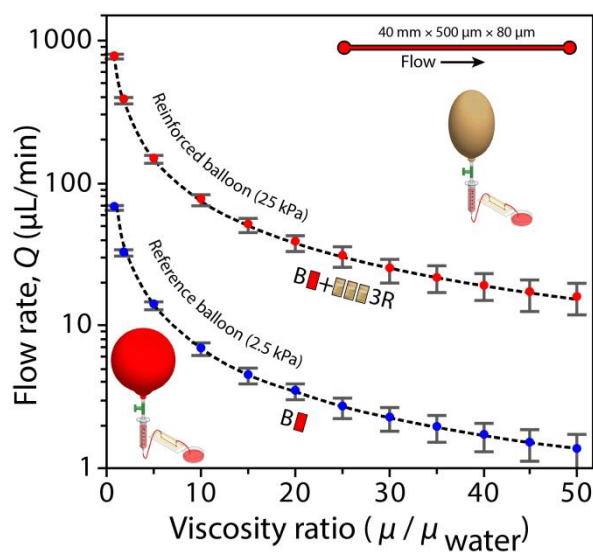

**Figure S9.** Liquid flow rate versus liquid viscosity ratio ( $Q$  vs.  $\mu/\mu_{\text{water}}$ ). Viscosity is changed by using various volumetric ratios of glycerol to water. Liquid is driven through a straight microfluidic channel using reference and reinforced latex balloons. Error bars correspond to average  $\pm$  standard deviation values obtained in three sets of independent experiments.

**Appendix 2:** Flow rate of liquid through the microfluidic system operated by a pressure pump

The liquid flow rate of the liquid through the microfluidic system operated by a pressure pump is set by the balloon inflation pressure and the viscous pressure drop along the system, as described below <sup>6</sup>:

$$P_{inflation} = P_{balloon} - P_{\infty} = \Delta P_{tubes} + \Delta P_{channel} = \frac{128 \mu Q L_{tube}}{\pi D_{tube}^4} + \frac{k \mu Q L_{channel}}{W_{channel} H_{channel}^3} \quad (2)$$

where,  $P_{balloon}$  and  $P_{\infty}$  are the internal balloon and ambient pressure,  $\mu$  is the liquid dynamic viscosity,  $Q$  is the liquid flow rate,  $L_{tube}$  and  $D_{tube}$  are the length and internal diameter of interconnecting Tygon® tubes at the inlet and outlet,  $k$  is a dimensionless parameter which depends on the aspect ratio of the microfluidic channel <sup>7</sup>, and  $L_{channel}$ ,  $W_{channel}$  and  $H_{channel}$  are the length, width and height of the microfluidic channel, respectively.

**Supporting information 10:** Instability patterns at the interface of two miscible liquids with a large viscosity contrast

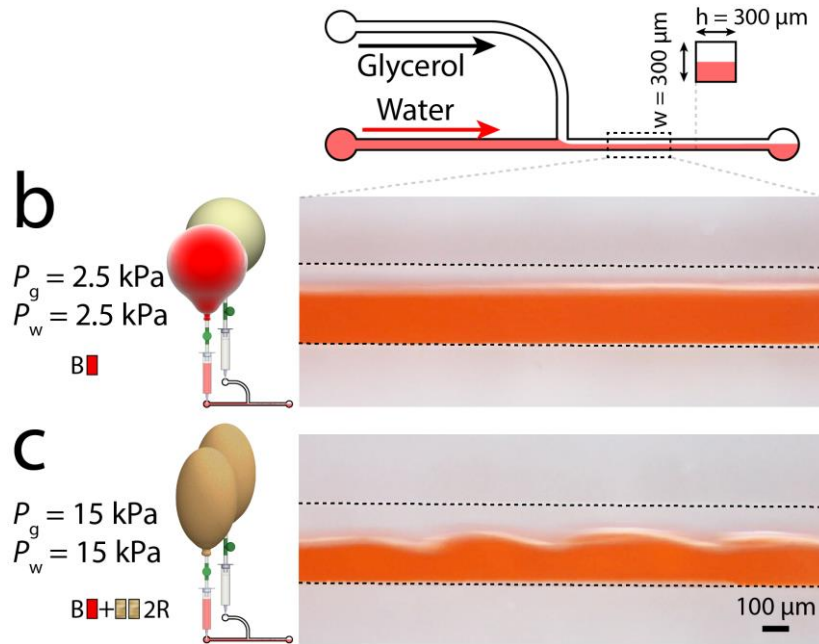

**Figure S10.** Instability patterns at the interface of water and glycerol due to a large viscosity contrast. ( $\mu_{\text{glycerol}} = 1078.2 \text{ mPa.s}$ ,  $\mu_{\text{water}} = 0.935 \text{ mPa.s}$ ) (a) Schematics of the microfluidic T-junction structure. (b) Laminar flow observed when operating the system with a pair of reference balloon pumps at  $P_{\text{inflation}} = 2.5 \text{ kPa}$ . (c) Instability patterns when operating the system with a pair of reinforced balloons (B + 2R) at  $P_{\text{inflation}} = 15 \text{ kPa}$ .



**Supplementary Information 11:** Increasing the generation rate of droplets using reinforced balloon pumps

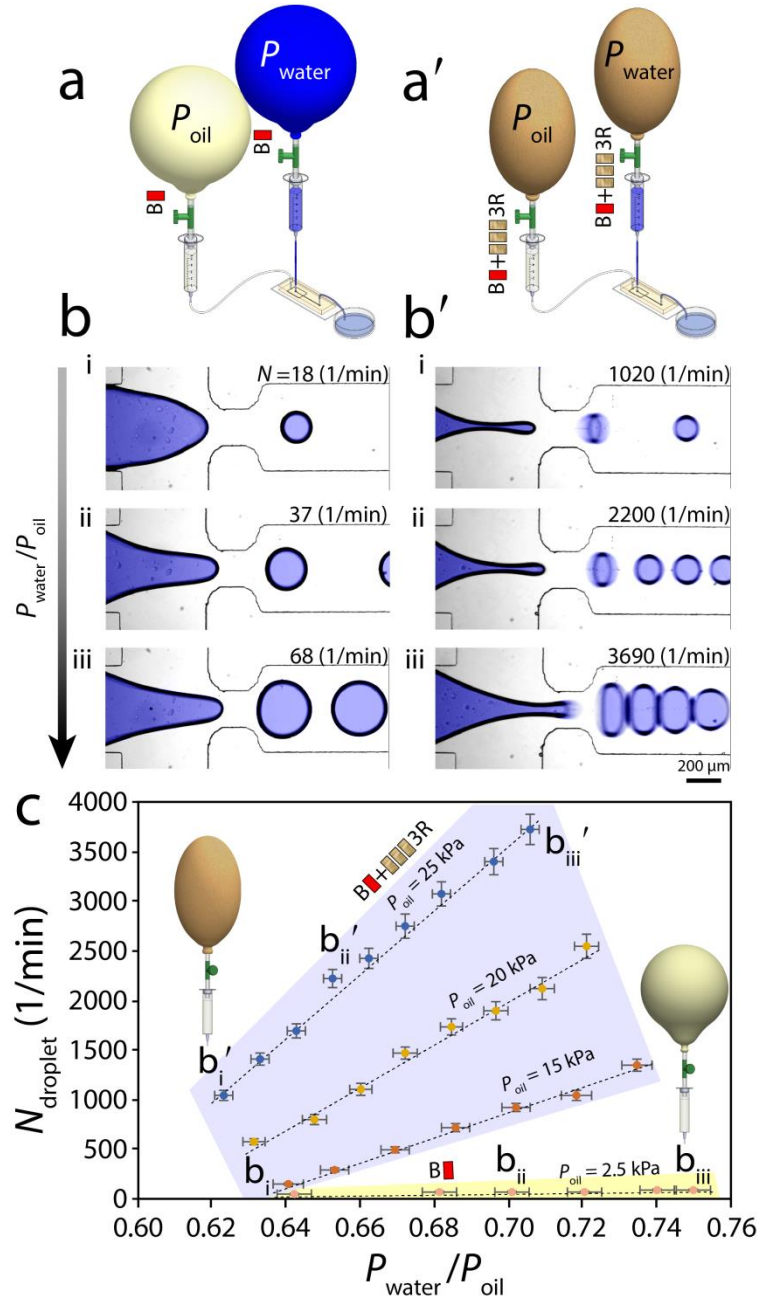

**Figure S11.** Increasing the generation rate of droplets through a flow focusing droplet generation system by implementing reinforced balloons pumps. Mineral oil (RTM8 oil, Sigma-Aldrich) with a viscosity of 10.37 mPa.s was used as the oil phase and water coloured with blue dye at a volumetric ratio of 20:1 with a viscosity of 0.93 mPa.s was used as the water phase: (a-b) Droplet generation using reference latex balloons operating at  $P_{\text{oil}} = 2.5$  kPa and various  $P_{\text{water}}/P_{\text{oil}}$  ratios. (a'-b') Droplet generation using reinforced latex balloons operating at  $P_{\text{oil}} = 25$  kPa and various  $P_{\text{water}}/P_{\text{oil}}$  ratios. (c) Droplet generation rate versus water to oil pressure ratio ( $N_{\text{droplet}}$  vs.  $P_{\text{water}}/P_{\text{oil}}$ ) obtained by reference and reinforced latex balloons. Error bars represent average  $\pm$  standard deviation obtained in four sets of independent experiments.

**Table S1.** Comparison of active pumping mechanisms common in microfluidic applications

| Category | Pump type                                  | Flow rate range <sup>i</sup> | Flow stability over time | Flow switching <sup>ii</sup> (dynamic flows) | Fabrication or maintenance requirement | Size   | Liquid sensitive <sup>iii</sup> | Temperature sensitive | Bio-compatible     | External power requirement | Low-power (battery operated) | Supporting equipment requirement | Cost          | Suitability for point-of-care applications |
|----------|--------------------------------------------|------------------------------|--------------------------|----------------------------------------------|----------------------------------------|--------|---------------------------------|-----------------------|--------------------|----------------------------|------------------------------|----------------------------------|---------------|--------------------------------------------|
| Off-chip | Syringe <sup>8,9</sup>                     | Low to High                  | Yes                      | Slow                                         | No                                     | Large  | No                              | No                    | Yes                | Yes                        | No                           | No                               | High          | No                                         |
|          | Pressure <sup>8</sup>                      | Low to High                  | Yes                      | Rapid                                        | No                                     | Large  | Yes                             | Yes                   | Yes                | Yes                        | No                           | Yes                              | High          | No                                         |
|          | Peristaltic <sup>10,11</sup> <sup>iv</sup> | Low to High                  | Yes                      | Slow                                         | No                                     | Large  | No                              | No                    | Yes                | Yes                        | No                           | No                               | High          | No                                         |
| On-chip  | Pneumatic <sup>12-14</sup>                 | Low                          | Yes                      | Rapid                                        | Yes                                    | Small  | Yes                             | Yes                   | Yes                | Yes                        | Yes                          | Yes                              | Low           | Yes                                        |
|          | Piezoelectric <sup>15-17</sup>             | Low to medium                | Yes                      | Rapid                                        | Yes <sup>v</sup>                       | Small  | Yes                             | Yes                   | Yes                | Yes                        | Yes                          | No                               | Low           | Yes                                        |
|          | Diaphragm <sup>18</sup>                    | Low to medium                | Yes                      | Rapid                                        | No <sup>vi</sup>                       | Small  | No                              | No                    | Yes                | Yes                        | Yes                          | No                               | Low           | Yes                                        |
|          | Centrifugal <sup>19-21</sup>               | Low to medium                | Yes                      | Rapid                                        | Yes                                    | Small  | Yes                             | Yes                   | Yes                | Yes                        | Yes                          | Yes                              | Low           | Yes                                        |
|          | Surface tension driven <sup>22,23</sup>    | Medium to high               | Yes                      | Rapid                                        | No <sup>vii</sup>                      | Small  | Yes                             | Yes                   | No <sup>viii</sup> | Yes                        | Yes                          | Yes                              | Low           | No                                         |
|          | Electroosmotic <sup>24-26</sup>            | Low                          | Yes                      | Rapid                                        | No                                     | Small  | Yes                             | Yes                   | Yes                | Yes                        | Yes                          | Yes                              | Low           | Yes                                        |
|          | Acoustic <sup>16,27-29</sup>               | Low to medium                | Yes                      | Rapid                                        | Yes                                    | Small  | No                              | Yes                   | Yes                | Yes                        | Yes                          | Yes                              | Low           | Yes                                        |
|          | Electro-hydrodynamic <sup>30-32</sup>      | Low to medium                | Yes                      | Rapid                                        | No                                     | Small  | Yes                             | No                    | No                 | Yes                        | Yes                          | No                               | Low           | No                                         |
|          | Reinforced balloon pressure pump           | Low to medium                | No <sup>ix</sup>         | Rapid                                        | No                                     | Medium | Yes <sup>x</sup>                | Yes <sup>xi</sup>     | Yes                | No                         | N/A                          | No                               | Extremely low | Yes                                        |
|          |                                            |                              |                          |                                              |                                        |        |                                 |                       |                    |                            |                              |                                  |               |                                            |

**Notes:**

- i. Low flow rates are defined as  $Q < 1$  mL/min, Medium flow rates are defined as  $1 < Q < 10$  mL/min, High flow rate are defined as  $Q > 10$  mL/min.
- ii. Rapid here refers to dynamic response times in the order of millisecond.
- iii. Being sensitive to liquid properties such as viscosity (pressure pumps), electrical conductivity (electro-hydrodynamic pumps), pH (electroosmotic, surface tension driven pumps).
- iv. Peristaltic pumps are particularly suitable for recirculation of liquid for long-term experiments.
- v. Commercially available miniaturised piezoelectric pumps are also available, as presented in<sup>33</sup>.
- vi. In this work<sup>18</sup>, commercially available miniaturised diaphragm pumps have been utilised.
- vii. The pumps referred to here are made of gallium based liquid metal alloys, which can be placed onto the desired locations of the system using a pipette.
- viii. Liquid metal pumps release gallium ions to the solution.
- ix. Pressure *vs* time curves are presented in Figure 2a.
- x. Flow rate *vs* liquid viscosity curves are presented in Figure S9.
- xi. Pressure *vs* temperature curves are presented in Figure 2d.

**Supplementary Information 12:** Variations of flow rate versus balloon inflation pressure through the microfluidic channel with a U-shaped contraction

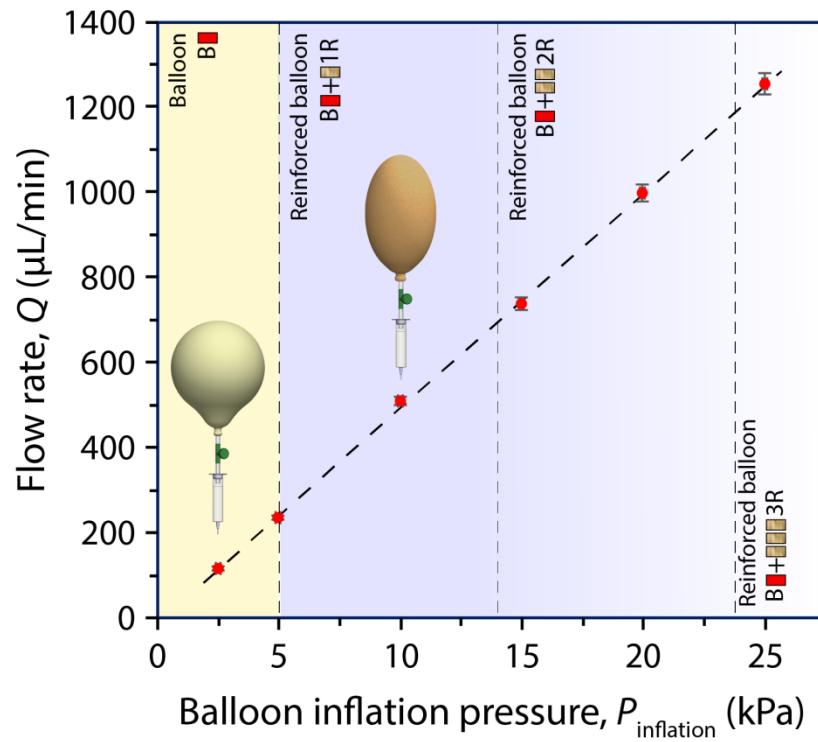

**Figure S12.** Variations of flow rate versus balloon inflation pressure ( $Q$  vs.  $P_{\text{inflation}}$ ) through the microfluidic channel with a U-shaped contraction used for the hydrodynamic manipulation of human monocytes. Error bars represent average  $\pm$  standard deviation obtained in five sets of independent experiments.

**Supplementary Information 13: Microscopic imaging of large human monocytes**

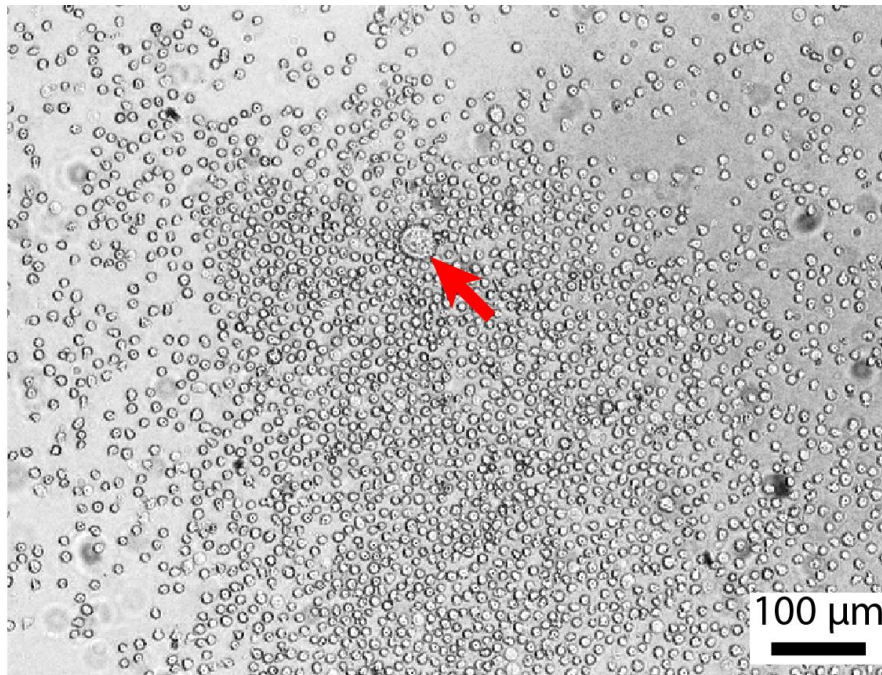

**Figure S13.** Microscopic images revealing the large size contrast between normal THP-1 monocytes ( $d_{\text{cell}} = 12.5 \pm 1.4 \mu\text{m}$ ) and large monocytes ( $d_{\text{cell}} = 40 \pm 3.6 \mu\text{m}$ ).

**Supplementary Information 14:** Lagrangian particle tracking model for the trajectory of human monocytes downstream of the U-shaped contraction

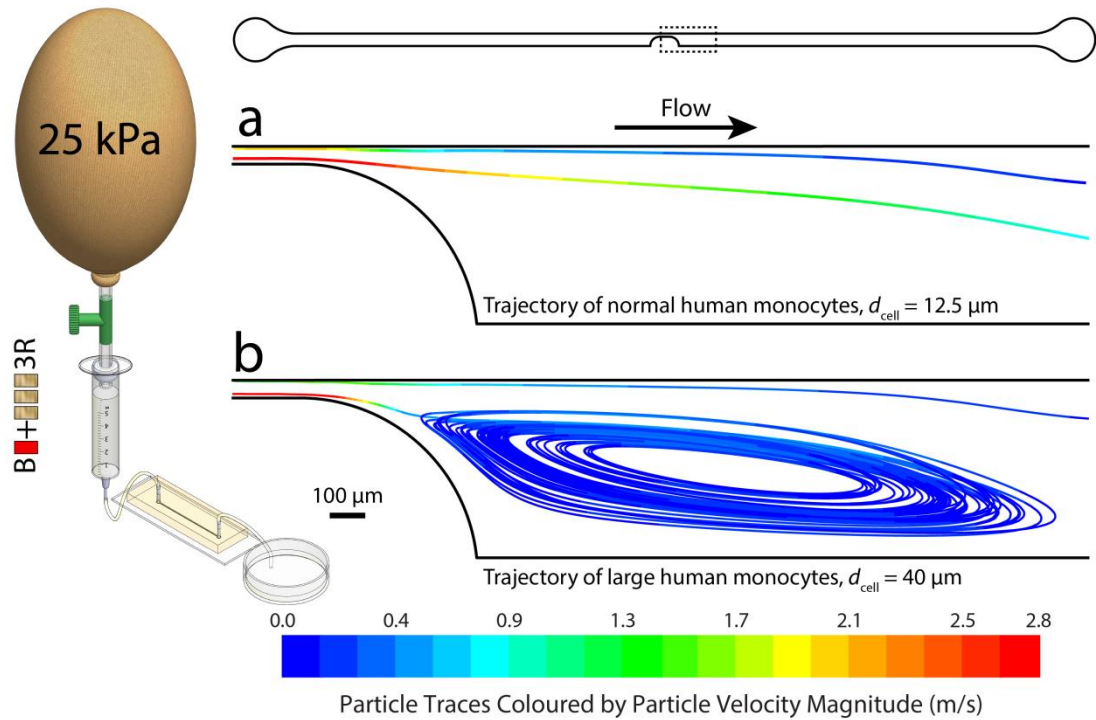

**Figure S14.** Flow streamlines at the downstream of the U-shaped contraction obtained by the Lagrangian particle tracking model. **(a)** Trajectory of normal THP-1 human monocytes ( $d_{\text{cell}}=12.5 \mu\text{m}$ ). **(b)** Trajectory of large human monocytes ( $d_{\text{cell}}=40 \mu\text{m}$ ).

**Supplementary Information 15:** Characterisation of capturing performance of the vortex at various cell concentrations

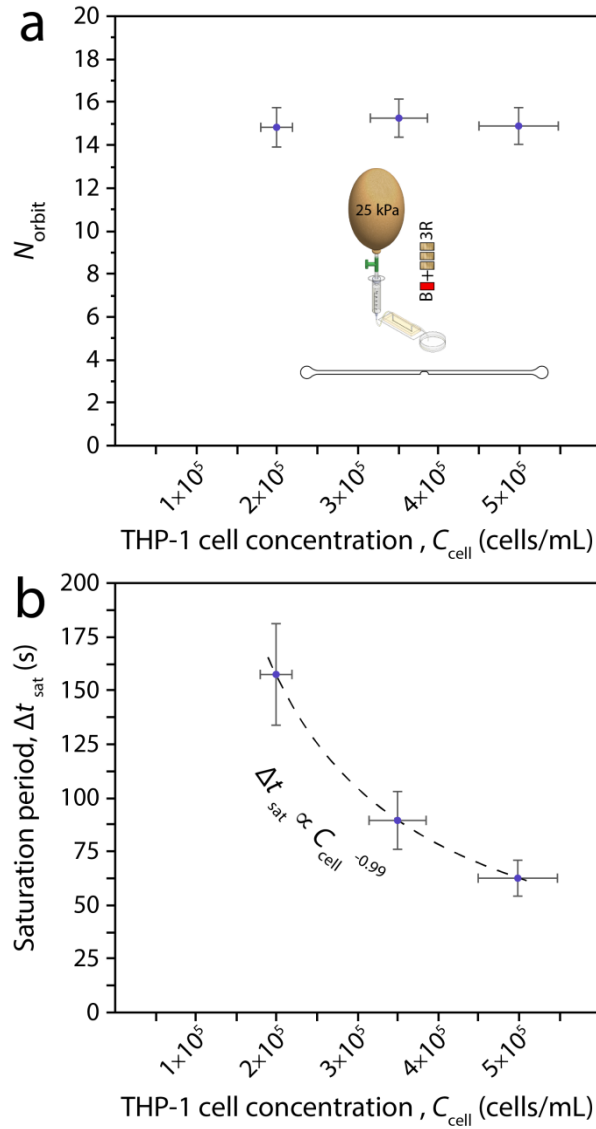

**Figure S15.** The cell vortex saturation characteristics of our microfluidic system. **(a)** Variations of the maximum number of captured cells against cell concentration ( $N_{\text{orbit}}$  vs.  $C_{\text{cell}}$ ). **(b)** Variations of the vortex saturation period against cell concentration ( $\Delta t_{\text{sat}}$  vs.  $C_{\text{cell}}$ ). Error bars represent average  $\pm$  standard deviation obtained in five sets of independent experiments.



**Supplementary Information 16:** Laminar flow of neighbouring red and blue streams at low pressures

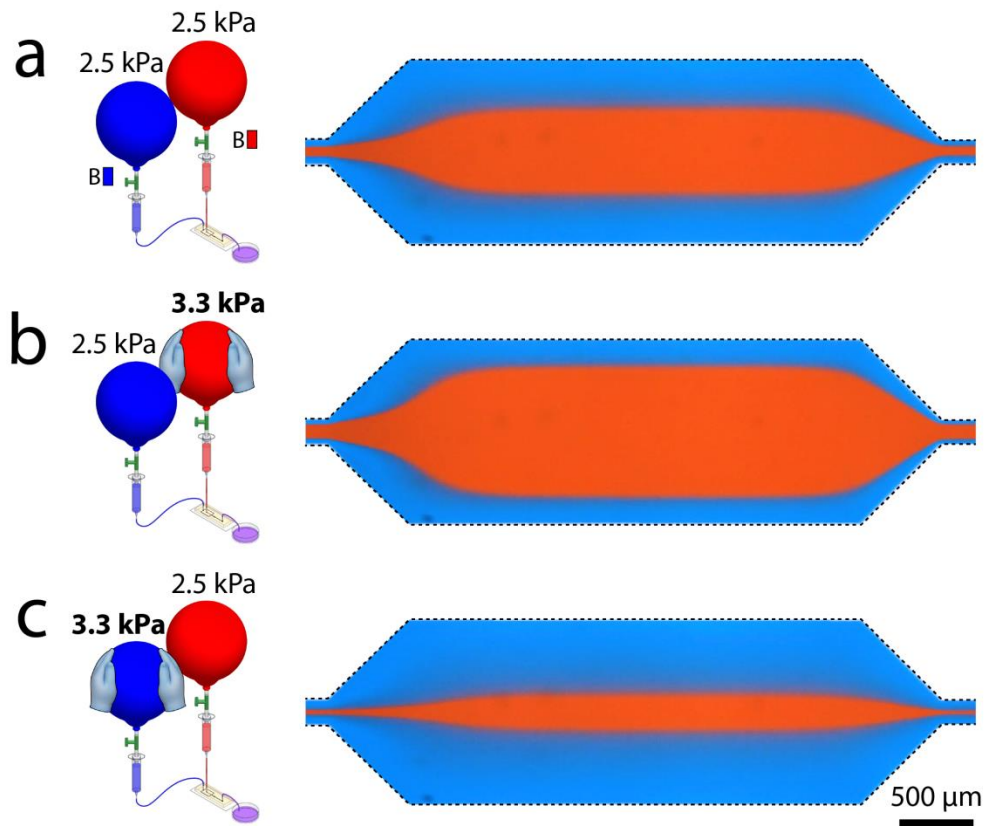

**Figure S16a.** Laminar flow of miscible red and blue flow using a pair of reference balloons at  $P_{\text{inflation}} = 2.5 \text{ kPa}$  **obtained by experiments:** (a) Static conditions. (b) Expanded core flow by manually squeezing of the red balloon. (c) Narrowed core flow by manually squeezing of the blue balloon.

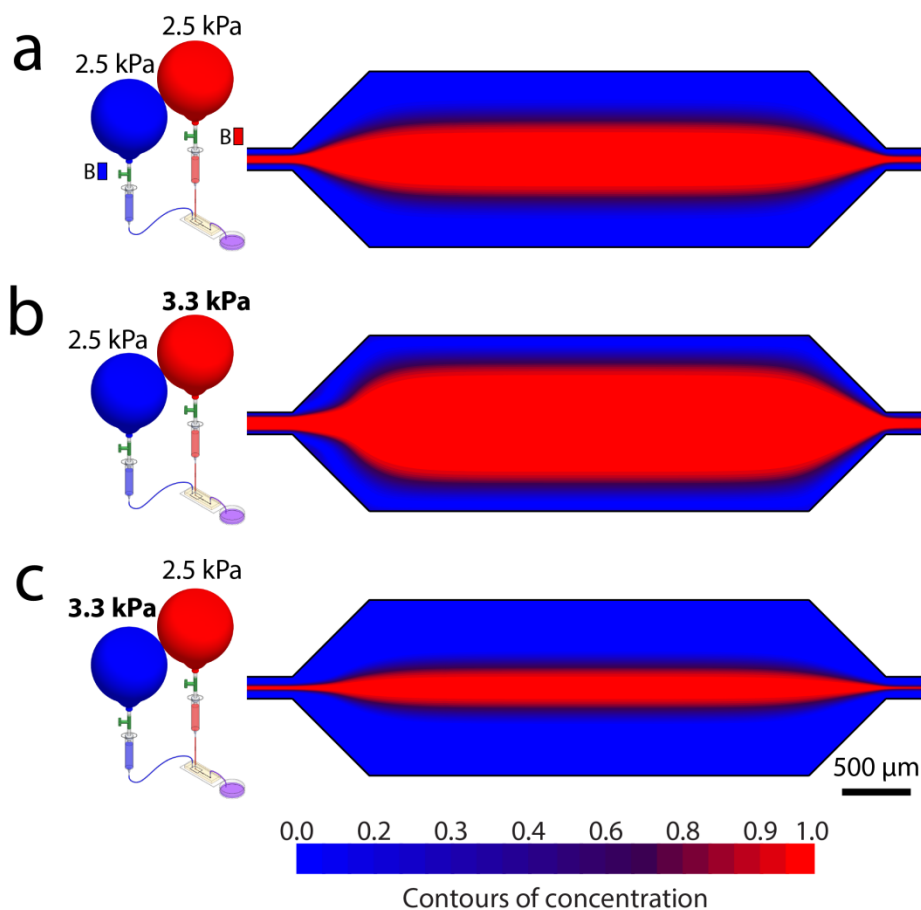

**Figure S16b.** Laminar flow of miscible red and blue flow using a pair of reference balloons at  $P_{\text{inflation}} = 2.5 \text{ kPa}$  **obtained by numerical simulations:** (a) Reference mode. (b) Expanded core flow by increasing the inflation pressure of the red balloon. (c) Narrowed core flow by increasing the inflation pressure of the blue balloon.



**Supplementary Information 17:** Vortex formation at the expanded channel at high inflation pressures

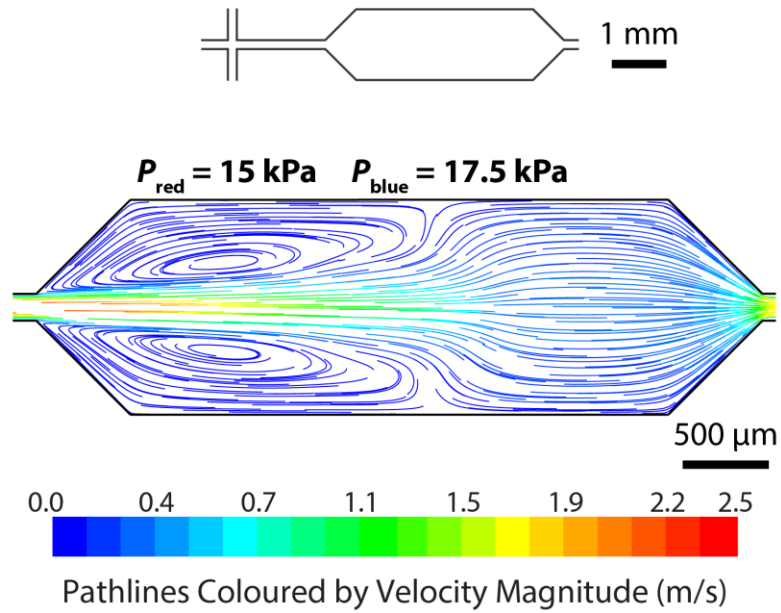

**Figure S17.** Flow streamlines obtained by numerical simulations revealing the formation of vortices at the expanded channel at high inflation pressures using reinforced balloons.

**Supplementary Information 18:** Dynamic pressure changes obtained by manually squeezing a reinforced balloon

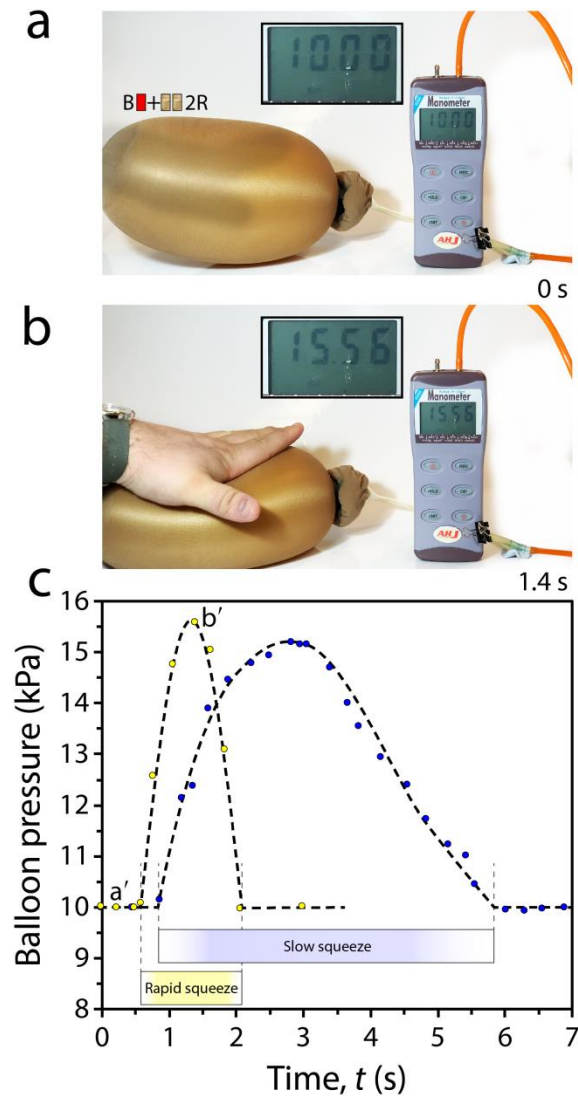

**Figure S18.** Dynamic pressure changes of a reinforced balloon following manual squeezing. (a-b) A reinforced balloon before and after manual squeezing with a digital pressure gauge. (c) The dynamic pressure curves obtained by various squeezing patterns.

**Supplementary Information 19:** Concentration profiles of red and blue flows through the flow focusing systems

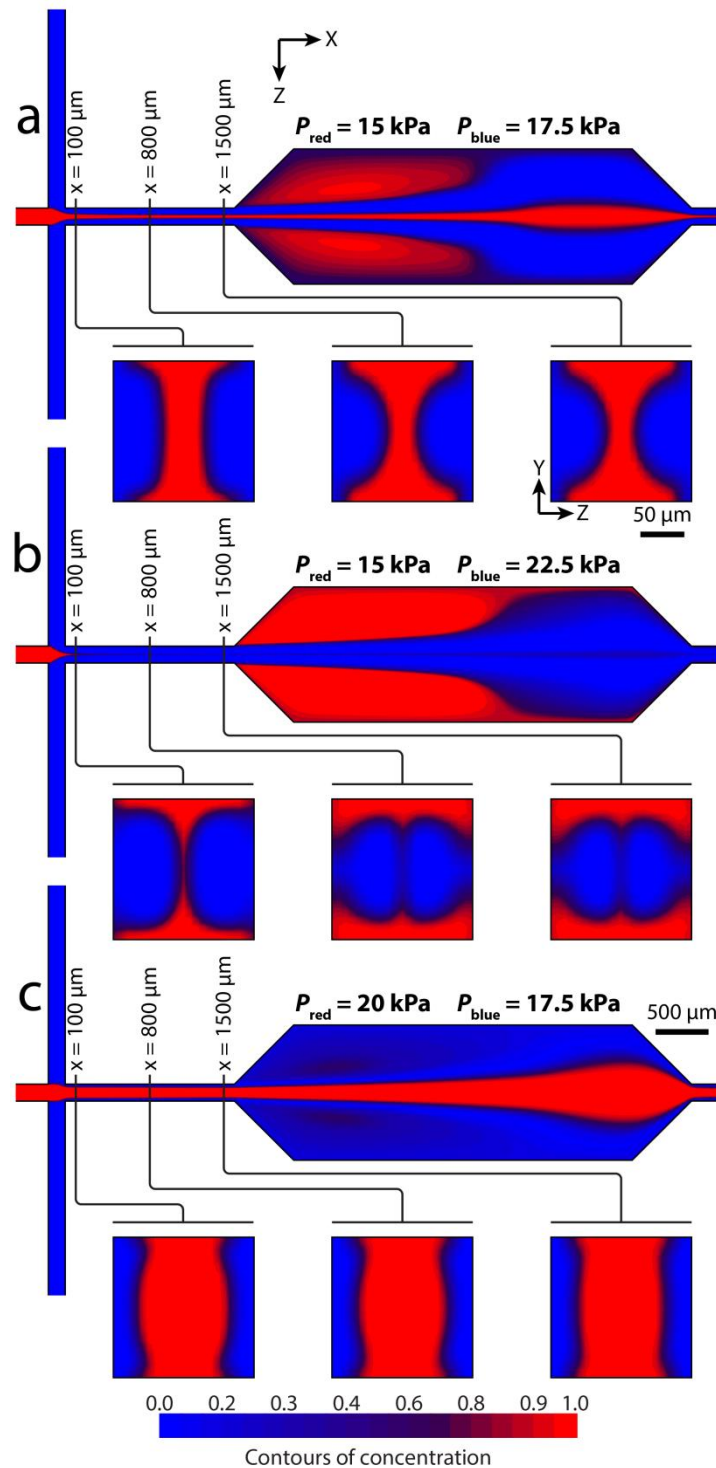

**Figure S19a.** Top-view concentration profile of red and blue flows through the flow focusing system obtained by numerical simulations at high inflation pressures: **(a)** Reference mode:  $P_{\text{red}} = 15 \text{ kPa}$ ,  $P_{\text{blue}} = 17.5 \text{ kPa}$ . **(b)** Narrowed core flow:  $P_{\text{red}} = 15 \text{ kPa}$ ,  $P_{\text{blue}} = 22.5 \text{ kPa}$ . **(c)** Expanded core flow:  $P_{\text{red}} = 20 \text{ kPa}$ ,  $P_{\text{blue}} = 17.5 \text{ kPa}$ . With insets showing the cross sections of the channel prior to the expansion.

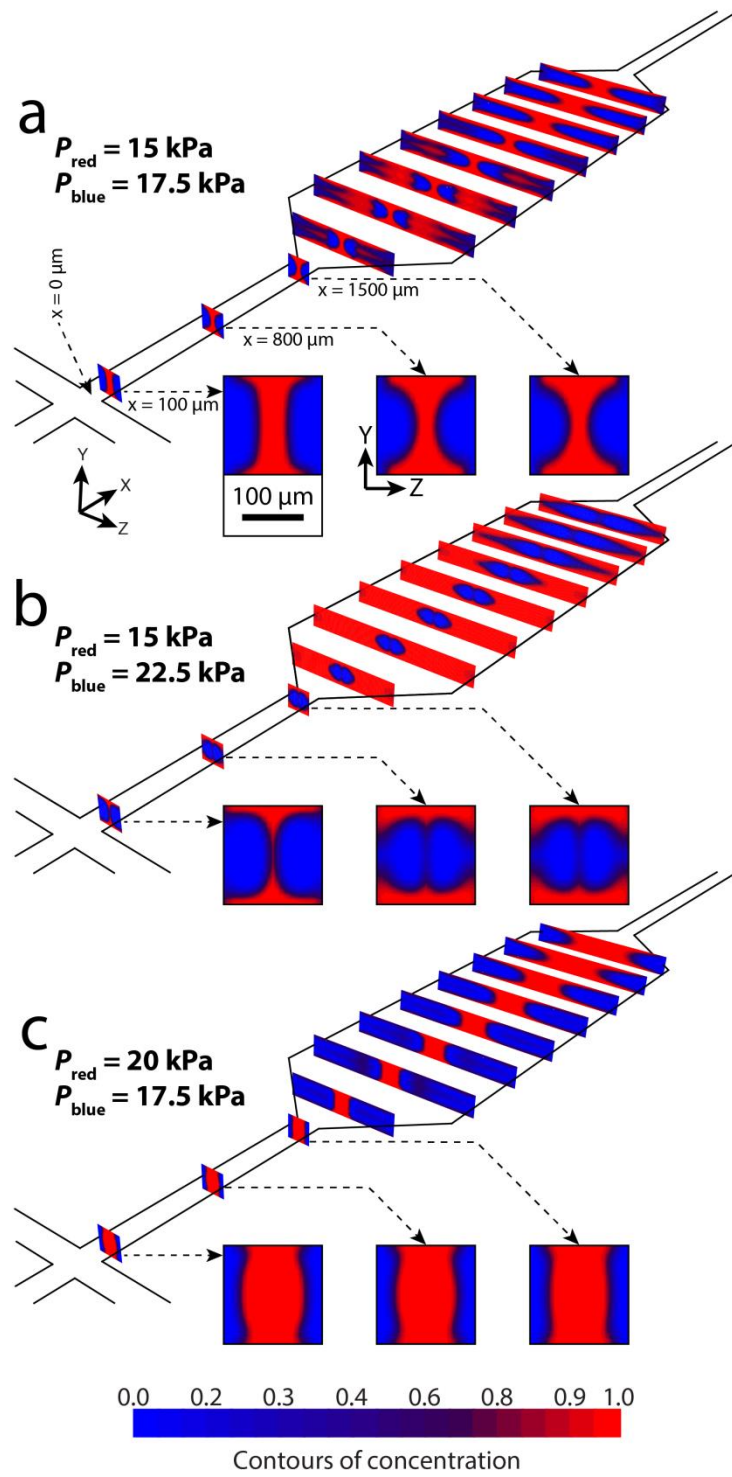

**Figure S19b. Isometric-view** concentration profile of red and blue flows through the flow focusing system obtained by numerical simulations at high inflation pressures: **(a)** Reference mode:  $P_{\text{red}} = 15 \text{ kPa}$ ,  $P_{\text{blue}} = 17.5 \text{ kPa}$ . **(b)** Narrowed core flow:  $P_{\text{red}} = 15 \text{ kPa}$ ,  $P_{\text{blue}} = 22.5 \text{ kPa}$ . **(c)** Expanded core flow:  $P_{\text{red}} = 20 \text{ kPa}$ ,  $P_{\text{blue}} = 17.5 \text{ kPa}$ . With insets showing the cross sections of the channel prior to the expansion.

**Supplementary Information 20:** Rapid exchange of solutions enabled by the manual squeezing of a reinforced balloon

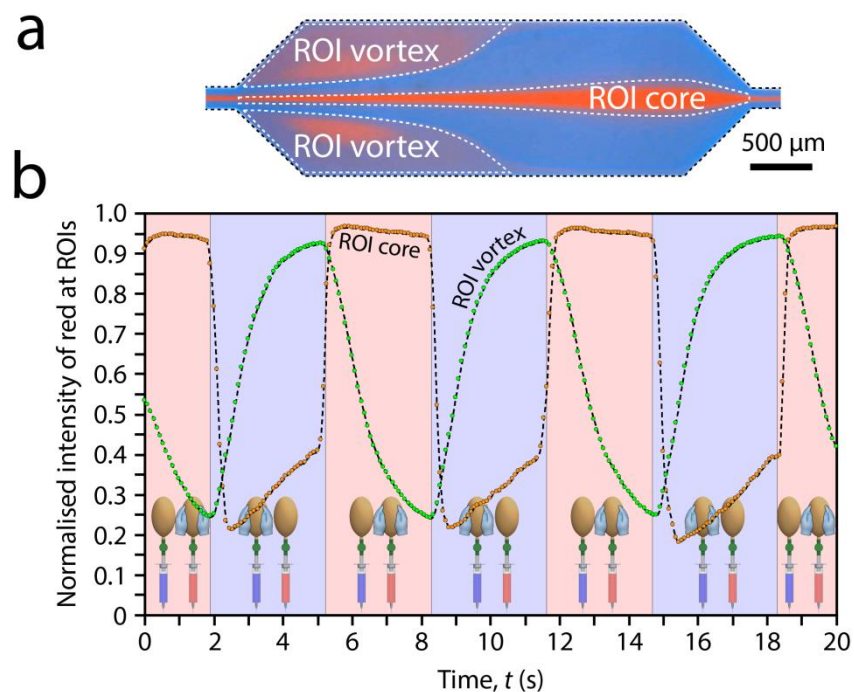

**Figure S20.** Rapid exchange of solutions within an expanded channel downstream of a flow focusing system enabled by the manual squeezing of a reinforced balloon. **(a)** The regions of interests (ROIs) for the vortices and core flow. **(b)** The normalised mean intensity of the red channel at the vortex and core ROIs extracted using ImageJ over time.

**Supplementary Information 21:** Investigating the mechanobiology of endothelial cells under shear stress using reinforced balloon pumps

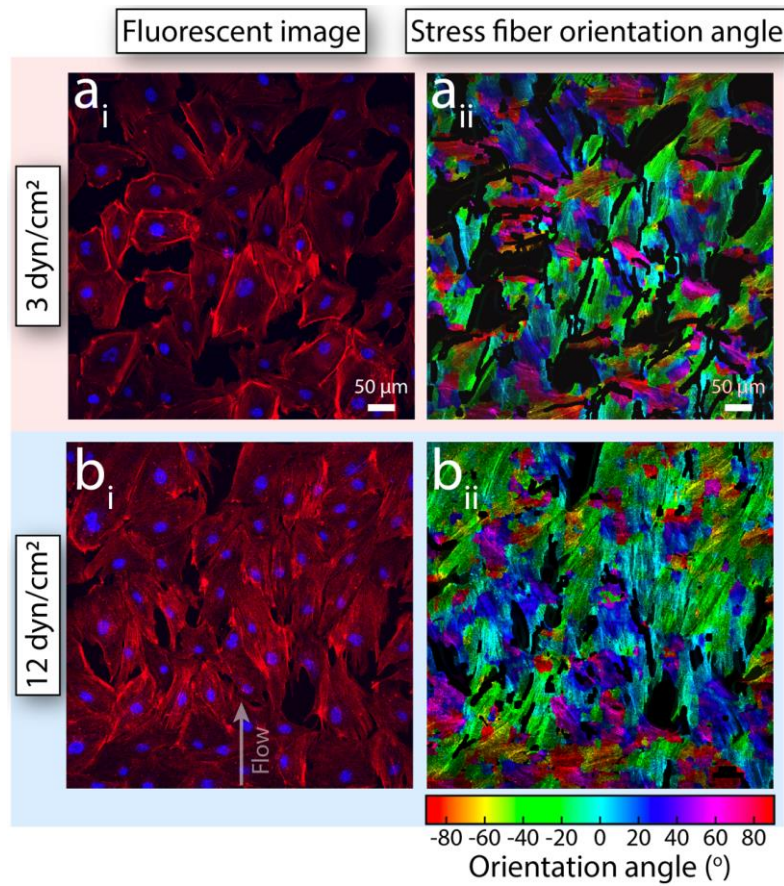

**Figure S22.** Investigating the mechanobiology of HAECs under shear stress utilising a reinforced balloon pump: (a<sub>i</sub>-b<sub>i</sub>) Fluorescent micrograph of HAECs following 9 hours of stimulation under low (3 dyne/cm<sup>2</sup>) and high (12 dyne/cm<sup>2</sup>) shear stress conditions, (a<sub>ii</sub>-b<sub>ii</sub>) Coloured contours of stress fiber orientation angle.



## References:

- 1 L. M. Kanner and C. O. Horgan, *Int J Non Linear Mech*, 2007, **42**, 204-215.
- 2 R. Mangan and M. Destrade, *Int J Non Linear Mech*, 2015, **68**, 52-58.
- 3 A. Needleman, *Int J Solids Struct*, 1977, **13**, 409-421.
- 4 I. Müller and H. Struchtrup, *Math Mech Solids*, 2002, **7**, 569-577.
- 5 M. Mooney, *J Appl Phys*, 1940, **11**, 582-592.
- 6 P. Thurgood, J. Y. Zhu, N. Nguyen, S. Nahavandi, A. R. Jex, E. Pirogova, S. Baratchi and K. Khoshmanesh, *Lab Chip*, 2018, **18**, 2730-2740.
- 7 M. J. Fuerstman, A. Lai, M. E. Thurlow, S. S. Shevkoplyas, H. A. Stone and G. M. Whitesides, *Lab Chip*, 2007, **7**, 1479-1489.
- 8 T. Ward, M. Faivre, M. Abkarian and H. A. Stone, *Electrophoresis*, 2005, **26**, 3716-3724.
- 9 S. Baratchi, F. J. Tovar-Lopez, K. Khoshmanesh, M. S. Grace, W. Darby, J. Almazi, A. Mitchell and P. McIntyre, *Biomicrofluidics*, 2014, **8**, 044117.
- 10 F. Tovar-Lopez, P. Thurgood, C. Gilliam, N. Nguyen, E. Pirogova, K. Khoshmanesh and S. Baratchi, *Front Bioeng Biotechnol*, 2019, **7**.
- 11 D. M. Lewis, N. Mavrogiannis, Z. Gagnon and S. Gerecht, *Biomicrofluidics*, 2018, **12**, 042202.
- 12 Y.-S. Lee, N. Bhattacharjee and A. Folch, *Lab Chip*, 2018, **18**, 1207-1214.
- 13 A. Pourmand, S. A. M. Shaegh, H. B. Ghavifekr, E. Najafi Aghdam, M. R. Dokmeci, A. Khademhosseini and Y. S. Zhang, *Sens Actuators B Chem*, 2018, **262**, 625-636.
- 14 C. Szydzik, A. F. Gavela, S. Herranz, J. Roccisano, M. Knoerzer, P. Thurgood, K. Khoshmanesh, A. Mitchell and L. M. Lechuga, *Lab Chip*, 2017, **17**, 2793-2804.
- 15 P.-H. Cazorla, O. Fuchs, M. Cochet, S. Maubert, G. Le Rhun, Y. Fouillet and E. Defay, *Sens Actuators A Phys*, 2016, **250**, 35-39.
- 16 Y. Lin, C. Gao, Y. Gao, M. Wu, A. Ahmadian Yazdi and J. Xu, *Sens Actuators B Chem*, 2019, **287**, 312-319.
- 17 Z. Cheng, X. Wu, J. Cheng and P. Liu, *Microfluid Nanofluidics*, 2017, **21**, 9.
- 18 K. A. Addae-Mensah, Y. K. Cheung, V. Fekete, M. S. Rendely and S. K. Sia, *Lab Chip*, 2010, **10**, 1618-1622.
- 19 S. Asiaei, S. Fakhari, E. Pishbin, F. Ghorbani-Bidkorbeh, M. Eghbal and M. Navidbakhsh, *J Micromech Microeng*, 2019, **29**, 075001.
- 20 F. Stumpf, F. Schwemmer, T. Hutzenlaub, D. Baumann, O. Strohmeier, G. Dingemanns, G. Simons, C. Sager, L. Plobner, F. von Stetten, R. Zengerle and D. Mark, *Lab Chip*, 2016, **16**, 199-207.
- 21 H. V. Nguyen, V. D. Nguyen, E. Y. Lee and T. S. Seo, *Biosens Bioelectron*, 2019, **136**, 132-139.
- 22 S.-Y. Tang, K. Khoshmanesh, V. Sivan, P. Petersen, A. P. O'Mullane, D. Abbott, A. Mitchell and K. Kalantar-zadeh, *Proc Natl Acad Sci USA*, 2014, **111**, 3304-3309.
- 23 J. Y. Zhu, P. Thurgood, N. Nguyen, K. Ghorbani and K. Khoshmanesh, *Lab Chip*, 2017, **17**, 3862-3873.
- 24 Z. Ye, R. Zhang, M. Gao, Z. Deng and L. Gui, *Micromachines*, 2019, **10**, 112.
- 25 X. Gao and Y. X. Li, *J Appl Phys*, 2018, **123**, 164301.
- 26 M. Vázquez Piñón, B. Cárdenas Benítez, B. Pramanick, V. H. Perez-Gonzalez, M. J. Madou, S. O. Martinez-Chapa and H. Hwang, *Sens Actuators A Phys*, 2017, **262**, 10-17.
- 27 J. Friend and L. Y. Yeo, *Rev Mod Phys*, 2011, **83**, 647-704.
- 28 A. R. Tovar, M. V. Patel and A. P. Lee, *Microfluid Nanofluidics*, 2011, **10**, 1269-1278.
- 29 R. Rimsa, A. J. Smith, C. Wälti and C. D. Wood, *Appl Phys Lett*, 2017, **111**, 234102.
- 30 M. K. Russel, S. M. Hasnain, P. R. Selvaganapathy and C. Y. Ching, *Microfluid Nanofluidics*, 2016, **20**, 112.
- 31 Y. Li, Y. Ren, W. Liu, X. Chen, Y. Tao and H. Jiang, *Electrophoresis*, 2017, **38**, 983-995.
- 32 S. K. Tadavani, J. R. Munroe and A. Yethiraj, *Soft Matter*, 2016, **12**, 9246-9255.
- 33 J. Akagi, K. Khoshmanesh, C. J. Hall, J. M. Cooper, K. E. Crosier, P. S. Crosier and D. Wlodkowic, *Sens Actuators B Chem*, 2013, **189**, 11-20.
